# THE AMERICAN JOURNAL OF PSYCHIATRY

---

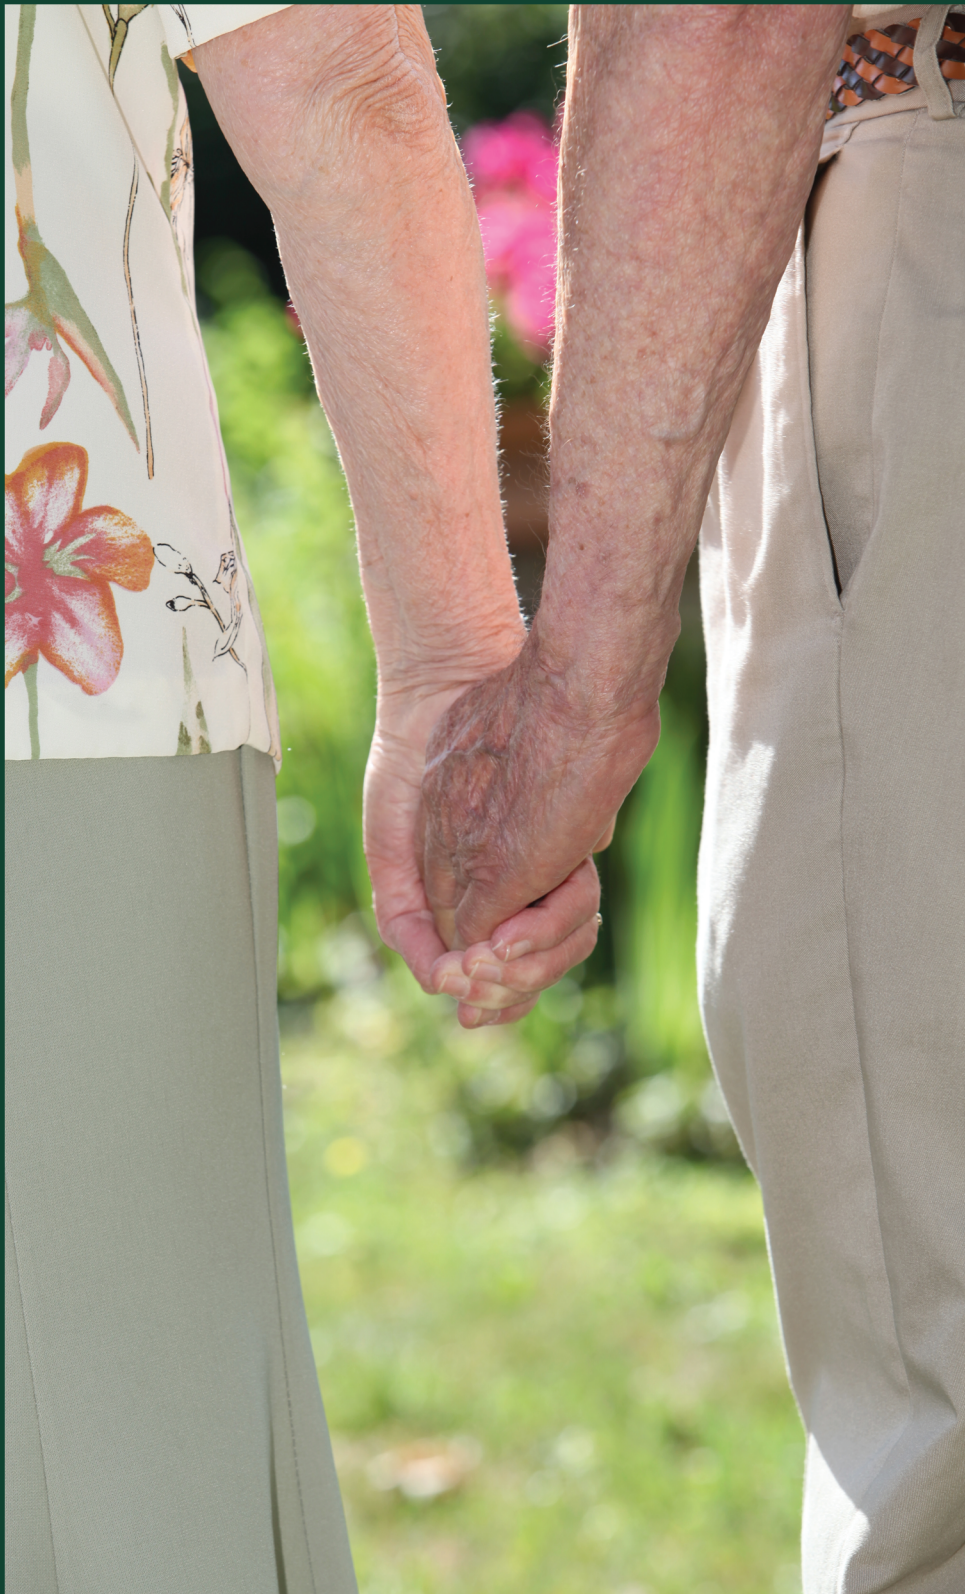

**Fragmentation and  
Unpredictability of Early-Life  
Experience in Mental Disorders**  
Tallie Z. Baram, M.D., Ph.D., et al. 907

**Change in Defense Mechanisms  
During Long-Term Dynamic  
Psychotherapy and Five-Year  
Outcome**  
J. Christopher Perry, M.P.H., M.D.,  
and Michael Bond, M.D. 916

**Cognitive Dysfunction and  
Anxious-Impulsive Personality  
Traits Are Endophenotypes for  
Drug Dependence**  
Karen D. Ersche, Ph.D., et al. 926

◀ **Meta-Analysis of  
Nonpharmacological Interventions  
for Neuropsychiatric Symptoms of  
Dementia**  
Henry Brodaty, D.Sc., and  
Caroline Arasaratnam, B.Psych. (Hons) 946

**Continuing Medical Education** 1005

**September 2012**  
**Volume 169 • Number 9**

---

Official Journal of the  
AMERICAN PSYCHIATRIC ASSOCIATION

---

[ajp.psychiatryonline.org](http://ajp.psychiatryonline.org)
