# THE AMERICAN JOURNAL OF PSYCHIATRY

## En este número

A11

### Perspectivas

#### Editoriales

885 Levantando la “represión” de las defensas en el campo de la psiquiatría

George Vaillant

888 Trastornos adictivos: al encuentro de los rasgos predisponentes

Alan C. Swann

891 Bioenergética para la depresión: algo diferente para la depresión

Stephen M. Strakowski **Audio**

894 Buenas noticias para el cuidado de la demencia: las intervenciones de los cuidadores reducen los síntomas del comportamiento en los pacientes con demencia y estrés familiar

Laura N. Gitlin

#### Imágenes en Psiquiatría

898 Nuvoluccia con su vestido vaporoso: la enfermedad mental de Lucia Joyce en *Finnegans Wake*

Luca Congia, Andrea Raballo y Antonio Preti

#### Tratamiento en Psiquiatría

900 Uso de antipsicóticos atípicos en pacientes con demencia: Manejo de problemas de seguridad

Martin Steinberg y Constantine G. Lyketsos

**Audio** **Guías clínicas**

#### Revisión y Resumen

907 Fragmentación e impredecibilidad de las experiencias tempranas de los trastornos mentales

Tallie Z. Baram, Elysia P. Davis, Andre Obenaus, Curt A. Sandman, Steven L. Small, Ana Solodkin y Hal Stern **Audio**

### Nuevas investigaciones

#### Artículos

916 Cambio en los mecanismos de defensa en la psicoterapia dinámica a largo plazo, y resultado a los cinco años

J. Christopher Perry y Michael Bond

**Audio** **Editorial** **EMC** **Guías clínicas**

926 La disfunción cognitiva y los rasgos de personalidad ansiosa-impulsiva son endofenotipos en la dependencia de las drogas

Karen D. Ersche, Abigail J. Turton, Samuel R. Chamberlain, Ulrich Müller, Edward T. Bullmore y Trevor W. Robbins **Editorial**

937 Un ensayo aleatorizado, doble ciego y controlado con placebo, del refuerzo con monohidrato de creatina para una mayor respuesta a un inhibidor selectivo de recaptura de serotonina en mujeres con trastorno depresivo mayor

In Kyoon Lyoo, Sujung Yoon, Tae-Suk Kim, Jaek Hwang, Jieun E. Kim, Wangyoun Won, Sujin Bae y Perry F. Renshaw **Audio** **Editorial**

946 Metanálisis de intervenciones no farmacológicas para los síntomas neuropsiquiátricos de la demencia

Henry Brodaty y Caroline Arasaratnam **Audio** **Editorial** **EMC** **Guías clínicas**

954 Efecto de los genes de riesgo de la enfermedad de Alzheimer en las trayectorias de la función cognitiva en el estudio de salud cardiovascular

Robert A. Sweet, Howard Seltman, James E. Emanuel, Oscar L. Lopez, James T. Becker, Joshua C. Bis, Elise A. Weamer, Mary Ann A. DeMichele-Sweet y Lewis H. Kuller **Audio** **EMC**

963 Estudio de asociación del genoma completo de pedigrís esquizofrénicos múltiplex

Douglas F. Levinson, Jianxin Shi, Kai Wang, Sang Oh, Brien Riley, Ann E. Pulver, Dieter B. Wildenauer, Claudine Laurent, Bryan J. Mowry, Pablo V. Gejman, Michael J. Owen, Kenneth S. Kendler, Gerald Nestadt, Sibylle G. Schwab, Jacques Mallet, Deborah Nertney, Alan R. Sanders, Nigel M. Williams, Brandon Wormley, Virginia K. Lasserter, Margot Albus, Stephanie Godard-Bauché, Madeline Alexander, Jubao Duan, Michael C. O'Donovan, Dermot Walsh, Anthony O'Neill, George N. Papadimitriou, Dimitris Dikeos, Wolfgang Maier, Bernard Lerer, Dominique Campion, David Cohen, Maurice Jay, Ayman Fanous, Peter Eichhammer, Jeremy M. Silverman, Nadine Norton, Nancy Zhang, Hakon Hakonarson, Cynthia Gao, Ami Citri, Mark Hansen, Stephan Ripke, The Schizophrenia Psychiatric GWAS Consortium, Frank Dudbridge y Peter A. Holmans

974 Tratamiento a corto plazo con tropisetron y déficits cognitivo y de filtrado auditivo P50 en la esquizofrenia

Xiang Yang Zhang, Lei Liu, Shaowen Liu, Xiaohong Hong, Da Chun Chen, Mei Hong Xiu, Fu De Yang, Zhijun Zhang, Xiangrong Zhang, Therese A. Kosten y Thomas R. Kosten

- 982 Estudios en humanos y en ratones implican al gen Neurocan en la etiología de la manía**  
Xavier Miró, Sandra Meier, Marie Luise Dreisow, Josef Frank, Jana Strohmaier, René Breuer, Christine Schmä, Önder Albayram, María Teresa Pardo-Olmedilla, Thomas W. Mühleisen, Franziska A. Degenhardt, Manuel Mattheisen, Iris Reinhard, Andras Bilkei-Gorzo, Sven Cichon, Constanze Seidenbecher, Marcella Rietschel, Markus M. Nöthen y Andreas Zimmer

## Comunicados y actualizaciones

### Cartas al Editor

- 991** Protegiendo la reputación de los psiquiatras en Internet  
La enfermedad celíaca y la esquizofrenia  
Interpretación alternativa del estudio de la detección temprana de la psicosis  
Necrosis palidal bilateral y toxicidad cardíaca en un paciente con sobredosis de venlafaxina y bupropión

### Fórum de libros

- 995** La inseparable naturaleza del amor y la agresividad: perspectivas clínicas y teóricas  
Trastornos del espectro autista  
Las mujeres en la psiquiatría: perspectivas personales

## Otros temas de interés

- 999** Actos oficiales  
**1005** Educación médica Continuada  
**A12** Directivos de la American Psychiatric Association  
**A14** Calendario

### Cubierta

En este número, un metanálisis de Brodaty y Arasaratnam (p. 946) encontró que las intervenciones no farmacológicas para los cuidadores de familia de pacientes con demencia en la comunidad ofrecen beneficios comportamentales similares a los que ofrecen los antipsicóticos. Concepto de la cubierta de Judy Castagna.

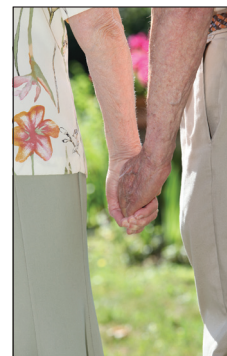

#### Audio

artículo en AJP Audio: archivo .mp3 descargable de [ajp.psychiatryonline.org](http://ajp.psychiatryonline.org)

#### Guías clínicas

este artículo ofrece guías clínicas (ver página "En este Número" o al final del artículo)

#### EMC

existe un curso en línea que cubre los contenidos de este artículo para los suscriptores del programa de cursos de EMC del AJP

#### Editorial

este artículo se discute en uno de los editoriales de este número

Presented in collaboration with the Office of Global Health,  
UMDNJ-Robert Wood Johnson Medical School

Translation courtesy of  
Sergi Casals, M.S.

*Garuna Editors, Barcelona, Spain*

Carlos Lopez Jaramillo, M.D.

*Universidad de Antioquia, Medellin, Colombia*

and

Javier I. Escobar, M.D., M.Sc.

*UMDNJ-Robert Wood Johnson Medical School*

Consulte *The American Journal of Psychiatry* en línea en  
[ajp.psychiatryonline.org](http://ajp.psychiatryonline.org)
